# Supplementary material
Source: Springer Nature journal article supplement (https://www.springermedizin.de/resource/supplementary/12903_2014_377_MOESM1_ESM.pdf/9516892)

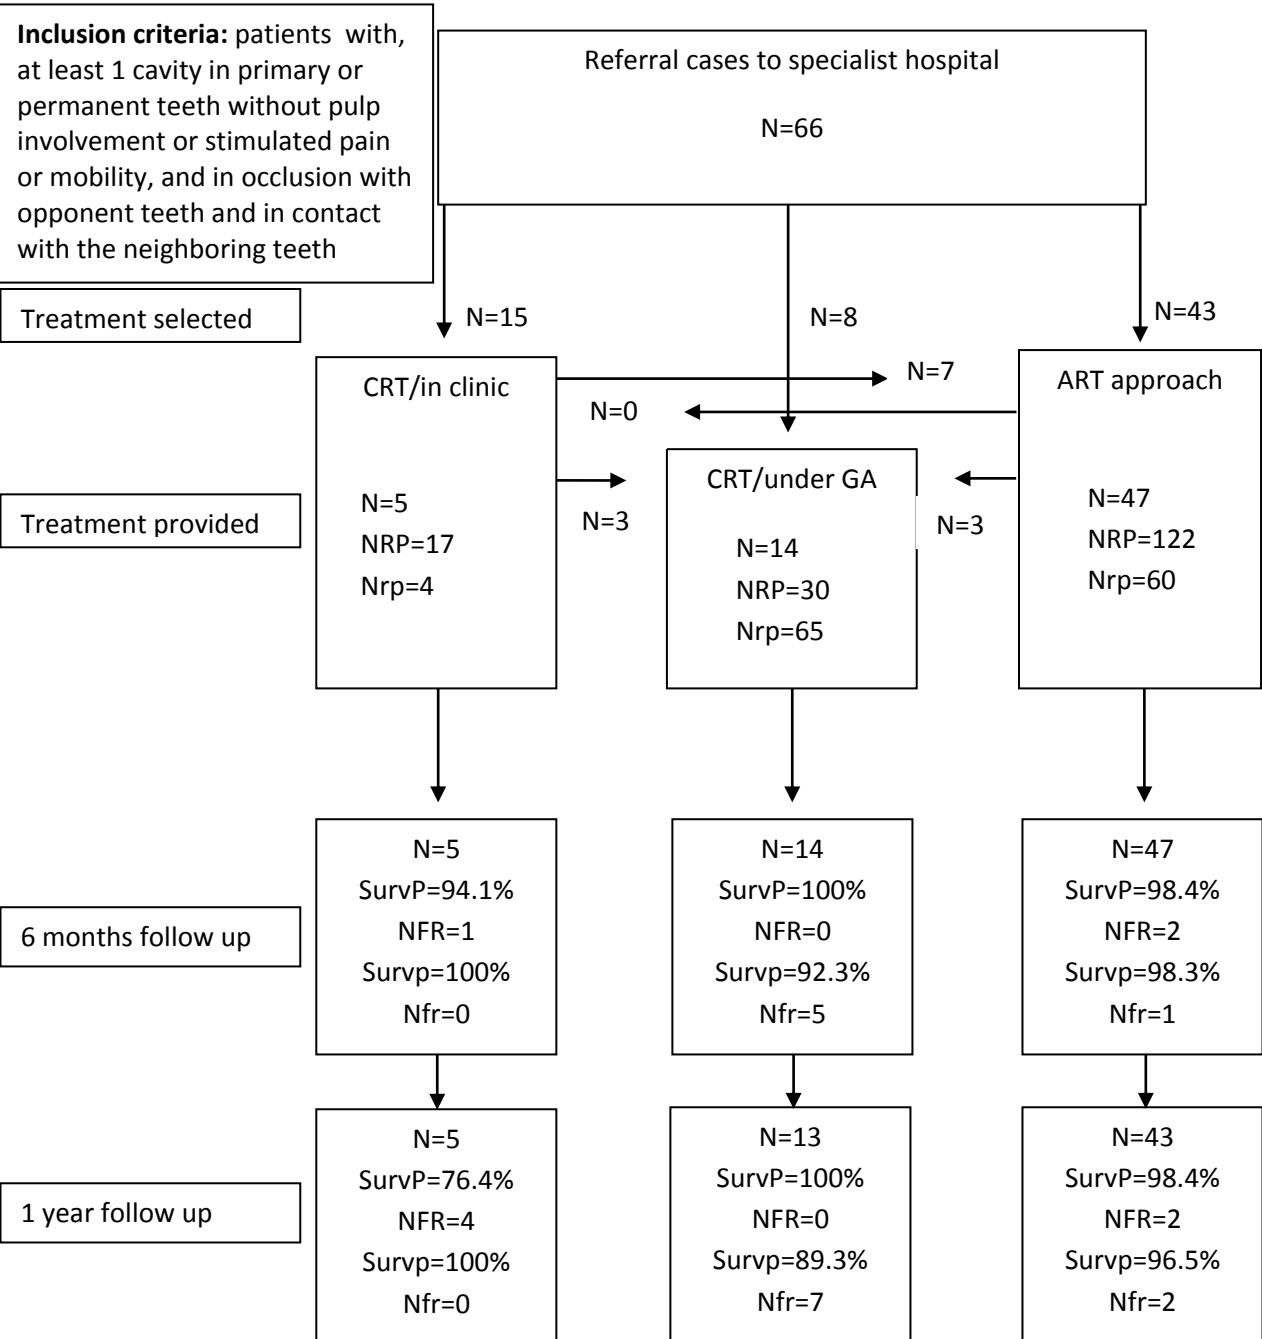

Supplement: MOESM1 [file 9516892]
